# Supplementary material
Source: MDPI journal article supplement (https://www.mdpi.com/2076-3417/8/9/1573)

ROC with Standard Scaling : Bee class

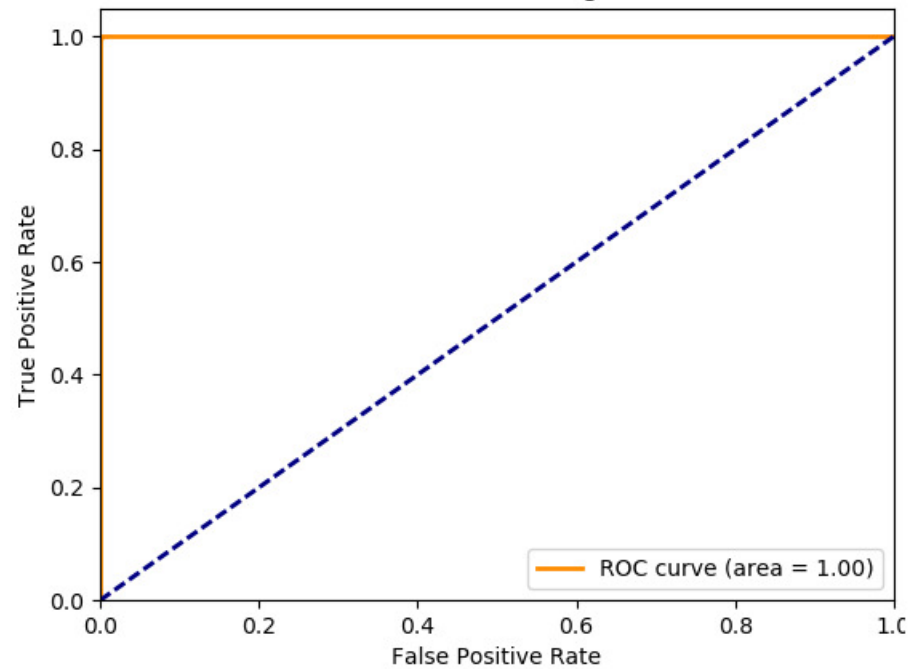

ROC with Standard Scaling : Noise class

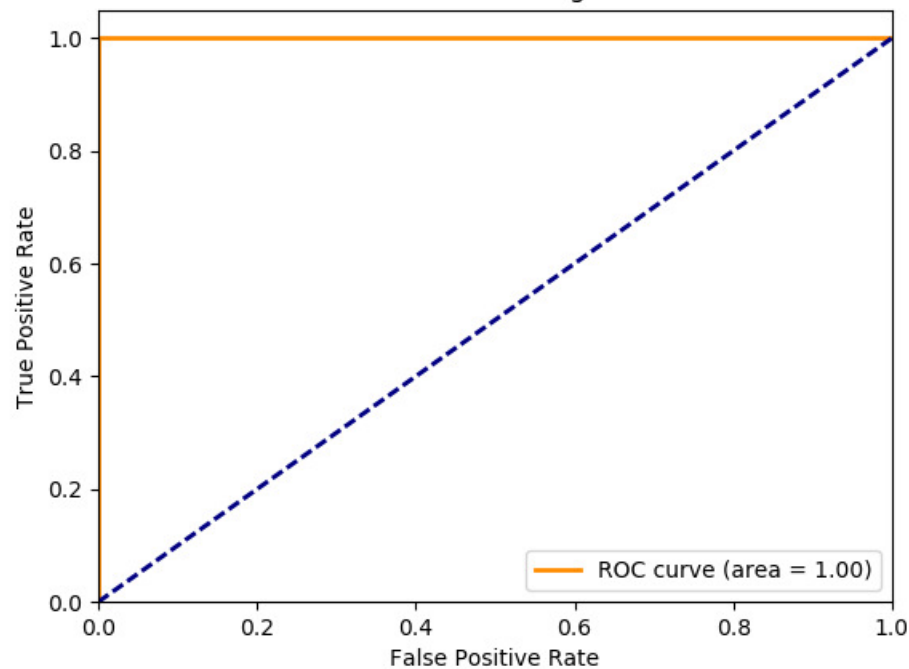

ROC with Standard Scaling : Cricket class

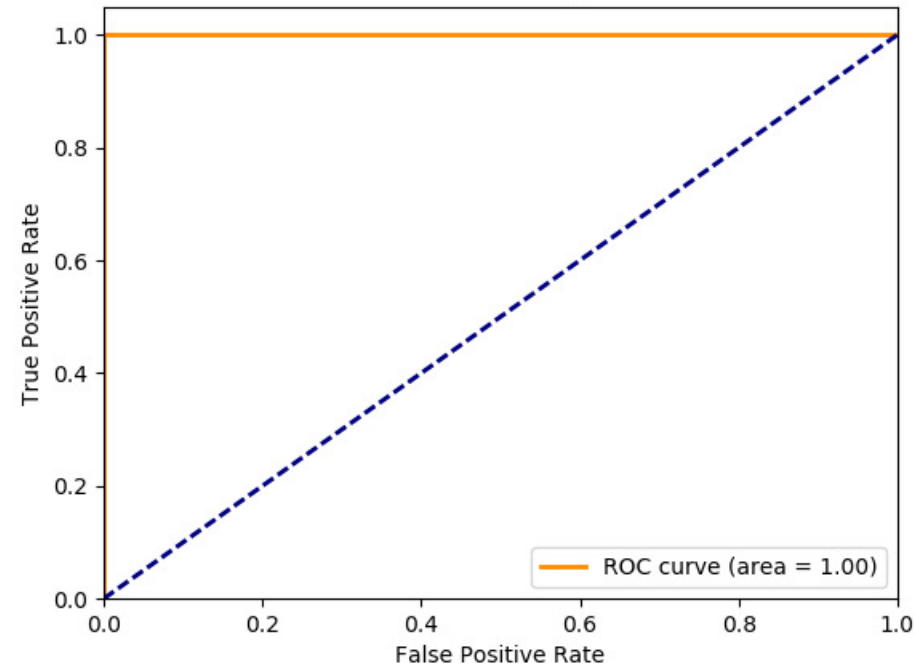

Supplement: s1 [file s1]
